# Supplementary material for: PAX8 Expression in the Crystalline Lens and Lens-Derived Lesions
Source: PubMed Central journal article supplement — Ophthalmol Sci. 2021 Apr 18;1(2):100024. doi: 10.1016/j.xops.2021.100024 (PMC9562292; doi:10.1016/j.xops.2021.100024), 2021-04-18
Supplement: mmc1.pdf [file mmc1.pdf]

**Supplemental Table 1. PAX8 in immunohistochemical profiling of normal anterior segment structures and pathologic processes.**

| Diagnosis                                | Specimen type | Age, Sex | Tissues with positive immunohistochemical staining |                                                |               |                         |               |               |               |
|------------------------------------------|---------------|----------|----------------------------------------------------|------------------------------------------------|---------------|-------------------------|---------------|---------------|---------------|
|                                          |               |          | PAX8                                               | Vimentin                                       | SMA           | S100                    | AE1/AE3       | CK5/6         | CK7           |
| Control, autopsy                         | Eyeball       | 1 mo, M  | Kepi, LE, ELB, CBE, IPE, IM                        | Kendo, KS, LE, ELB, CBE, CBS, CBM, IPE, IS, IM | CBM, IM       | LE, IPE, CBE, ISM, CBSM | Kepi, CE      | Kepi, CE      | CE, CBE, IPE  |
| Control, uveal melanoma                  | Lens          | 62 y, F  | LE                                                 | LE                                             |               | LE                      |               |               |               |
| Control, retinoblastoma                  | Eyeball       | 2 y, M   | Kepi, LE, ELB, CBE, IPE, IM                        | Not performed                                  | Not performed | Not performed           | Not performed | Not performed | Not performed |
| Control, retinoblastoma                  | Eyeball       | 2 y, M   | Kepi, LE, ELB, CBE, IPE, IM                        | Not performed                                  | Not performed | Not performed           | Not performed | Not performed | Not performed |
| Control, retinoblastoma                  | Eyeball       | 1 y, M   | Kepi, LE, ELB, CBE, IPE, IM                        | Not performed                                  | Not performed | Not performed           | Not performed | Not performed | Not performed |
| Control, retinoblastoma                  | Eyeball       | 22 y, M  | Kepi, LE, ELB, CBE, IPE, IM                        | Not performed                                  | Not performed | Not performed           | Not performed | Not performed | Not performed |
| Control, optic disc medulloepithelioma*  | Eyeball       | 25 y, M  | Kepi, LE, ELB, CBE, IPE, IM                        | Not performed                                  | Not performed | Not performed           | Not performed | Not performed | Not performed |
| Control, metastatic renal cell carcinoma | Eyeball       | 60 y, F  | Kepi, LE, ELB, CBE, IPE, IM                        | Not performed                                  | Not performed | Not performed           | Not performed | Not performed | Not performed |
| Control, uveal melanoma*                 | Eyeball       | 56 y, M  | Kepi, LE, ELB, CBE, IPE, IM                        | Not performed                                  | Not performed | Not performed           | Not performed | Not performed | Not performed |
| Control, maxillofacial tumor             | Eyeball       | 60 y, F  | Kepi, LE, ELB, CBE, IPE, IM                        | Not performed                                  | Not performed | Not performed           | Not performed | Not performed | Not performed |
| Phakomatous choristoma                   | Eyelid        | 2 mo, M  | LE, BC                                             | LE, BC, FBLC                                   | FBLC          | LE, BC                  |               |               |               |

| Diagnosis                                                                                         | Specimen type              | Age, Sex | Tissues with positive immunohistochemical staining          |                                                         |                             |                             |               |               |                |
|---------------------------------------------------------------------------------------------------|----------------------------|----------|-------------------------------------------------------------|---------------------------------------------------------|-----------------------------|-----------------------------|---------------|---------------|----------------|
|                                                                                                   |                            |          | PAX8                                                        | Vimentin                                                | SMA                         | S100                        | AE1/AE3       | CK5/6         | CK7            |
| Peters anomaly, adherent leukoma, sclerocornea                                                    | Cornea                     | 1 y, F   | Kepi, LE, BC                                                | KS, LE                                                  | KS                          | LE, BC                      | Kepi, CE      | Kepi, CE      | CE             |
| Cataract (ASC, PSC), blind eye                                                                    | Eyeball                    | 43 y, M  | Kepi, LE, ELB, BC, CBE, IPE, IM                             | Kendo, KS, LE, ELB, ASC, BC, CBE, CBS, CBM, IPE, IS, IM | ASC, CBM, IM                | LE, BC, IPE, CBE, ISM, CBSM | Kepi, CE      | Kepi, CE      | CE             |
| Cataract (ASC, PSC), retinoblastoma                                                               | Eyeball                    | 3 y, F   | Kepi, LE, ELB, BC, CBE, IPE, IM                             | Kendo, KS, LE, ELB, ASC, BC, CBE, CBS, CBM, IPE, IS, IM | ASC, CBM, IM                | LE, BC, IPE, CBE, ISM, CBSM | Kepi, CE      | Kepi, CE      | CE, CBE, IPE   |
| Congenital anterior polar pyramidal cataract                                                      | Anterior lens capsule      | 10 mo, F | LE, FBLC                                                    | LE, FBLC                                                | FBLC                        | LE, FBLC (focal)            |               |               |                |
| Cataract (Soemmerring ring), blind eye (cornea not in the sections)                               | Eyeball                    | 66 y, F  | LE, ELB, BC, CBE                                            | Kendo, KS, LE, ELB, CBE, CBS, CBM, IPE, IS, IM          | CBM, IM                     |                             |               |               | CE             |
| Cataract (Soemmerring ring) with capsular fibrosis, adenocarcinoma of RPE*                        | Eyeball                    | 67 y, F  | Kepi, LE, ELB, CBE, IPE, IM, capsular fibrosis (rare cells) | Kendo, KS, LE, ELB, CBE, CBS, CBM, IPE, IS, IM          | Not performed               | Not performed               | Not performed | Not performed | CE, CBE, IPE   |
| Cataract (capsular fibrosis s/p cataract extraction), choroidal melanoma (cornea not in sections) | Eyeball                    | 62, M    | LE, ELB, CBE                                                | LE, ELB, CBE, CBS, CBM, IPE, IS, IM                     | Capsular fibrosis, CBM, IM  | LE, IPE, CBE, ISM, CBSM     |               |               | CBE, IPE       |
| Retrocorneal fibrous membrane (Kendo/fibrosis, KS/fibrosis), failed PKP                           | Posterior cornea, Membrane | 69 y, M  |                                                             | Kendo/fibrosis, KS/fibrosis                             | Kendo/fibrosis, KS/fibrosis |                             |               |               | Kendo/fibrosis |

| Diagnosis                                                                   | Specimen type         | Age, Sex | Tissues with positive immunohistochemical staining |                                                |                             |                     |                   |                   |                                           |
|-----------------------------------------------------------------------------|-----------------------|----------|----------------------------------------------------|------------------------------------------------|-----------------------------|---------------------|-------------------|-------------------|-------------------------------------------|
|                                                                             |                       |          | PAX8                                               | Vimentin                                       | SMA                         | S100                | AE1/AE3           | CK5/6             | CK7                                       |
| Retrocorneal membrane (Kendo/fibrosis, LE/fibrosis), failed KPro            | KPro membrane         | 78 y, F  | LE                                                 | Kendo/fibrosis, LE/fibrosis                    | Kendo/fibrosis, LE/fibrosis |                     |                   |                   | Kendo/fibrosis, LE/fibrosis               |
| Retrocorneal membrane (Kendo/fibrosis, LE/fibrosis, Kepi down), failed PKP  | Cornea                | 47 y, F  | Kepi, Kepi down                                    | KS, Kendo/fibrosis, LE/fibrosis                | Kendo/fibrosis, LE/fibrosis |                     | Kepi, Kepi down   | Kepi, Kepi down   |                                           |
| Retrocorneal membrane (Kepi down, Kendo/fibrosis), perforated corneal ulcer | Retrocorneal membrane | 64 y, M  | Kepi down                                          | Kendo/fibrosis                                 | Kendo/fibrosis              |                     | Kepi down         | Kepi down         | Kepi down (focal), Kendo/fibrosis (focal) |
| Retrocorneal membrane (Kendo/fibrosis, CE down), aphakia, trauma            | Eyeball               | 50 y, M  | Kepi                                               | KS, Kendo/fibrosis, CBE, CBS, CBM, IPE, IS, IM | Kendo/fibrosis, CBM, IM     | IPE, CBE, ISM, CBSM | Kepi, CE, CE down | Kepi, CE, CE down | CE, CE down, CBE, IPE                     |
| Retrocorneal membrane (CE down), failed KPro, aphakia                       | Eyeball               | 57 y, M  | Kepi, CE, CE down                                  | KS, CBE, CBS, CBM                              | KS                          | CBE                 | Kepi, CE          | Kepi, CE, CE down | CE, CE down, CBE                          |

\*Cases included in prior study (Reference 12) Mudhar HS, Milman T, Eagle RC Jr, et al. Usefulness of PAX8 immunohistochemistry in adult intraocular tumor diagnosis. *Ophthalmology*. 2020:S0161-6420(20)30958-1.

mo = month, y = year, M = male, F = female, Kepi = corneal epithelium, KS = corneal stroma, Kendo = corneal endothelium, CE = conjunctival epithelium, LE = lens epithelium, ELB = equatorial lens bow, CBE = ciliary body epithelium, CBS = ciliary body stroma, CBM = ciliary body muscle, CBSM = ciliary body stromal melanocytes, RPE = retinal pigment epithelium, IPE = iris pigment epithelium, IS = iris stroma, IM = iris muscle, ISM = iris stromal melanocytes, BC = bladder cells, FBLC = fibroblast-like cells, ASC = anterior subcapsular cataract, PSC = posterior subcapsular cataract, Kendo/fibrosis = corneal endothelium-derived fibrous membrane, KS/fibrosis = corneal stromal-derived fibrous membrane, LE/fibrosis = lens epithelial-derived fibrous membrane, PKP = penetrating keratoplasty, KPro = keratoprosthesis, Kepi down = corneal epithelial downgrowth, CE down = conjunctival epithelial downgrowth
